# Supplementary material for: Membrane type 1-matrix metalloproteinase induces epithelial-to-mesenchymal transition in esophageal squamous cell carcinoma: Observations from clinical and in vitro analyses
Source: PubMed Central journal article supplement (PMC4768157; doi:10.1038/srep22179), 2016-02-26
Supplement: srep22179-s1.pdf [file srep22179-s1.pdf]

**Membrane type 1-matrix metalloproteinase induces  
epithelial-to-mesenchymal transition in esophageal squamous cell  
carcinoma: Observations from clinical and *in vitro* analyses**

Lijuan Pang<sup>1#</sup>, Qiuxiang Li<sup>1</sup>, Shugang Li<sup>2</sup>, Jianwei He<sup>3</sup>, Weiwei Cao<sup>1</sup>, Jiaojiao Lan<sup>1</sup>,  
Bin Sun<sup>4</sup>, Hong Zou<sup>1</sup>, Chengyan Wang<sup>1</sup>, Ruixue Liu<sup>1</sup>, Cuilei Wei<sup>1</sup>, Yutao Wei<sup>5</sup>, Yan  
Qi<sup>1</sup>, Jianming Hu<sup>1</sup>, Weihua Liang<sup>1</sup>, Wen Jie Zhang<sup>1</sup>, Mei Wan<sup>6</sup>, Feng Li<sup>1\*</sup>

<sup>1</sup>Department of Pathology and Key Laboratory of Xinjiang Endemic and Ethnic Diseases (Ministry of Education), Shihezi University School of Medicine, Shihezi 832002, Xinjiang, China

<sup>2</sup>Department of Public Health, Medical School, Shihezi University School of Medicine, Shihezi 832002, Xinjiang, China

<sup>3</sup>Department of Clinical Laboratory, First Affiliated Hospital to Shihezi University School of Medicine, Shihezi 832008, Xinjiang, China

<sup>4</sup>Department of Stomatology, First Affiliated Hospital to Shihezi University School of Medicine, Shihezi 832008, Xinjiang, China

<sup>5</sup>Department of Thoracic and Cardiovascular Surgery, First Affiliated Hospital to Shihezi University School of Medicine, Shihezi 832008, Xinjiang, China.

<sup>6</sup>Department of Orthopedic Surgery, Johns Hopkins University School of Medicine, Baltimore, MD 21205, USA

# **First author: Dr. Lijuan Pang, M.D, Ph.D** E-mail: [ocean123456@163.com](mailto:ocean123456@163.com)

\* **Corresponding author: Dr. Feng Li, M.D, Ph.D** Department of Pathology and Key Laboratory of Xinjiang Endemic and Ethnic Diseases (Ministry of Education), Shihezi University School of Medicine (E-mail: [lifeng7855@126.com](mailto:lifeng7855@126.com))

**Supplement Table S1. Relationship between MT1-MMP protein expression and the clinical, pathological features in xinjiang Kazakh ESCC.**

**Table S1**

| Parameters                       | cases | MT1-MMP expression |    | p     |
|----------------------------------|-------|--------------------|----|-------|
|                                  |       | -                  | +  |       |
| <b>Gender</b>                    |       |                    |    |       |
| male                             | 55    | 2                  | 53 | 0.629 |
| female                           | 33    | 2                  | 31 |       |
| <b>Age (years)</b>               |       |                    |    |       |
| <60                              | 41    | 1                  | 40 | 0.62  |
| ≥ 60                             | 47    | 3                  | 44 |       |
| <b>Histopathological Grading</b> |       |                    |    |       |
| Well                             | 25    | 1                  | 24 | 0.55  |
| Moderate                         | 54    | 2                  | 52 |       |
| poor                             | 9     | 1                  | 8  |       |
| <b>Lymph node metastasis</b>     |       |                    |    |       |
| Negative (No)                    | 31    | 2                  | 29 | 0.611 |
| Positive (N1)                    | 57    | 2                  | 55 |       |
| <b>Fibrous membranes</b>         |       |                    |    |       |
| Absent                           | 49    | 3                  | 46 | 0.626 |
| Present                          | 39    | 1                  | 38 |       |
| <b>Stage</b>                     |       |                    |    |       |
| I+IIA                            | 29    | 0                  | 29 | 0.371 |
| IIB                              | 35    | 2                  | 33 |       |
| III+IV                           | 24    | 2                  | 22 |       |
