# Supplementary material for: Membrane type 1-matrix metalloproteinase induces epithelial-to-mesenchymal transition in esophageal squamous cell carcinoma: Observations from clinical and in vitro analyses
Source: PubMed Central journal article supplement (PMC4768157; doi:10.1038/srep22179), 2016-02-26
Supplement: srep22179-s2.pdf [file srep22179-s2.pdf]

**Membrane type 1-matrix metalloproteinase induces  
epithelial-to-mesenchymal transition in esophageal squamous cell  
carcinoma: Observations from clinical and *in vitro* analyses**

Lijuan Pang<sup>1#</sup>, Qiuxiang Li<sup>1</sup>, Shugang Li<sup>2</sup>, Jianwei He<sup>3</sup>, Weiwei Cao<sup>1</sup>, Jiaojiao Lan<sup>1</sup>, Bin Sun<sup>4</sup>, Hong Zou<sup>1</sup>, Chengyan Wang<sup>1</sup>, Ruixue Liu<sup>1</sup>, Cuilei Wei<sup>1</sup>, Yutao Wei<sup>5</sup>, Yan Qi<sup>1</sup>, Jianming Hu<sup>1</sup>, Weihua Liang<sup>1</sup>, Wen Jie Zhang<sup>1</sup>, Mei Wan<sup>6</sup>, Feng Li<sup>1\*</sup>

<sup>1</sup>Department of Pathology and Key Laboratory of Xinjiang Endemic and Ethnic Diseases (Ministry of Education), Shihezi University School of Medicine, Shihezi 832002, Xinjiang, China

<sup>2</sup>Department of Public Health, Medical School, Shihezi University School of Medicine, Shihezi 832002, Xinjiang, China

<sup>3</sup>Department of Clinical Laboratory, First Affiliated Hospital to Shihezi University School of Medicine, Shihezi 832008, Xinjiang, China

<sup>4</sup>Department of Stomatology, First Affiliated Hospital to Shihezi University School of Medicine, Shihezi 832008, Xinjiang, China

<sup>5</sup>Department of Thoracic and Cardiovascular Surgery, First Affiliated Hospital to Shihezi University School of Medicine, Shihezi 832008, Xinjiang, China.

<sup>6</sup>Department of Orthopedic Surgery, Johns Hopkins University School of Medicine, Baltimore, MD 21205, USA

# **First author: Dr. Lijuan Pang, M.D, Ph.D** E-mail: [ocean123456@163.com](mailto:ocean123456@163.com)

\* **Corresponding author: Dr. Feng Li, M.D, Ph.D** Department of Pathology and Key Laboratory of Xinjiang Endemic and Ethnic Diseases (Ministry of Education), Shihezi University School of Medicine (E-mail: [lifeng7855@126.com](mailto:lifeng7855@126.com))

**Supplement Table S2. Snail and Slug protein expression in relation to clinical pathological characteristics in Kazakh ESCC.**

**Table S2**

| Clinicopathologica<br>features | Snail |    |       |                  | Slug |    |       |                  |
|--------------------------------|-------|----|-------|------------------|------|----|-------|------------------|
|                                | -     | +  | 2+/3+ | z<br>P           | -    | +  | 2+/3+ | z<br>P           |
| N                              | 22    | 15 | 5     | -4.562           | 24   | 16 | 2     | -4.635           |
| Ca                             | 13    | 40 | 35    | <b>&lt;0.001</b> | 23   | 24 | 41    | <b>&lt;0.001</b> |
| Sex                            |       |    |       |                  |      |    |       |                  |
| Male                           | 5     | 31 | 19    | -0.114           | 15   | 19 | 21    | -0.923           |
| Female                         | 8     | 9  | 16    | 0.909            | 8    | 5  | 20    | 0.356            |
| Age (y)                        |       |    |       |                  |      |    |       |                  |
| <60                            | 6     | 22 | 13    | -1.118           | 11   | 7  | 23    | -0.81            |
| ≥60                            | 7     | 18 | 22    | 0.264            | 12   | 17 | 18    | 0.408            |
| Tumor invasion                 |       |    |       |                  |      |    |       |                  |
| Superficial layer              | 5     | 20 | 24    | -2.094           | 11   | 12 | 26    | -1.017           |
| Deep layer                     | 8     | 20 | 11    | 0.036            | 12   | 12 | 15    | 0.309            |
| LN metastases                  |       |    |       |                  |      |    |       |                  |
| Yes                            | 8     | 27 | 22    | -0.133           | 15   | 14 | 28    | -0.419           |
| No                             | 5     | 13 | 13    | 0.894            | 8    | 10 | 13    | 0.675            |
| Tumor differentiation          |       |    |       |                  |      |    |       |                  |
| Well                           | 8     | 13 | 4     | -3.402           | 7    | 9  | 9     | -0.967           |
| Moderate-poor                  | 5     | 27 | 31    | <b>0.001</b>     | 16   | 15 | 32    | 0.333            |
| Stage                          |       |    |       |                  |      |    |       |                  |
| I + II                         | 9     | 21 | 34    | -3.399           | 12   | 16 | 36    | -3.151           |
| III+ IV                        | 4     | 19 | 1     | <b>0.001</b>     | 11   | 8  | 5     | <b>0.002</b>     |

P-values ≤ 0.05 are in bold.
