# Supplementary material for: Membrane type 1-matrix metalloproteinase induces epithelial-to-mesenchymal transition in esophageal squamous cell carcinoma: Observations from clinical and in vitro analyses
Source: PubMed Central journal article supplement (PMC4768157; doi:10.1038/srep22179), 2016-02-26
Supplement: srep22179-s3.pdf [file srep22179-s3.pdf]

**Membrane type 1-matrix metalloproteinase induces  
epithelial-to-mesenchymal transition in esophageal squamous cell  
carcinoma: Observations from clinical and *in vitro* analyses**

Lijuan Pang<sup>1#</sup>, Qiuxiang Li<sup>1</sup>, Shugang Li<sup>2</sup>, Jianwei He<sup>3</sup>, Weiwei Cao<sup>1</sup>, Jiaojiao Lan<sup>1</sup>,  
Bin Sun<sup>4</sup>, Hong Zou<sup>1</sup>, Chengyan Wang<sup>1</sup>, Ruixue Liu<sup>1</sup>, Cuilei Wei<sup>1</sup>, Yutao Wei<sup>5</sup>, Yan  
Qi<sup>1</sup>, Jianming Hu<sup>1</sup>, Weihua Liang<sup>1</sup>, Wen Jie Zhang<sup>1</sup>, Mei Wan<sup>6</sup>, Feng Li<sup>1\*</sup>

<sup>1</sup>Department of Pathology and Key Laboratory of Xinjiang Endemic and Ethnic Diseases (Ministry of Education), Shihezi University School of Medicine, Shihezi 832002, Xinjiang, China

<sup>2</sup>Department of Public Health, Medical School, Shihezi University School of Medicine, Shihezi 832002, Xinjiang, China

<sup>3</sup>Department of Clinical Laboratory, First Affiliated Hospital to Shihezi University School of Medicine, Shihezi 832008, Xinjiang, China

<sup>4</sup>Department of Stomatology, First Affiliated Hospital to Shihezi University School of Medicine, Shihezi 832008, Xinjiang, China

<sup>5</sup>Department of Thoracic and Cardiovascular Surgery, First Affiliated Hospital to Shihezi University School of Medicine, Shihezi 832008, Xinjiang, China.

<sup>6</sup>Department of Orthopedic Surgery, Johns Hopkins University School of Medicine, Baltimore, MD 21205, USA

# **First author: Dr. Lijuan Pang, M.D, Ph.D** E-mail: [ocean123456@163.com](mailto:ocean123456@163.com)

\* **Corresponding author: Dr. Feng Li, M.D, Ph.D** Department of Pathology and Key Laboratory of Xinjiang Endemic and Ethnic Diseases (Ministry of Education), Shihezi University School of Medicine (E-mail: [lifeng7855@126.com](mailto:lifeng7855@126.com))

**Supplement Table S3. Correlation between the expression of E-CAD protein and Snail, Slug Proteins in ESCC.**

**Table S3**

| E-CAD | Snail                      |    |       | Slug                       |    |       |
|-------|----------------------------|----|-------|----------------------------|----|-------|
|       | -                          | +  | 2+/3+ | -                          | +  | 2+/3+ |
| -     | 1                          | 2  | 20    | 1                          | 1  | 21    |
| +     | 4                          | 37 | 15    | 14                         | 22 | 20    |
| 2+/3+ | 8                          | 1  | 0     | 8                          | 1  | 0     |
|       | r=-0.648 <b>P&lt;0.001</b> |    |       | r=-0.594 <b>P&lt;0.001</b> |    |       |

P-values  $\leq 0.05$  are in bold.
